# Supplementary figures and images for: The Ancient History of Peptidyl Transferase Center Formation as Told by Conservation and Information Analyses
Source: MDPI journal article supplement (doi:10.3390/life10080134), 2020-08-05

**a) PTC\_all**

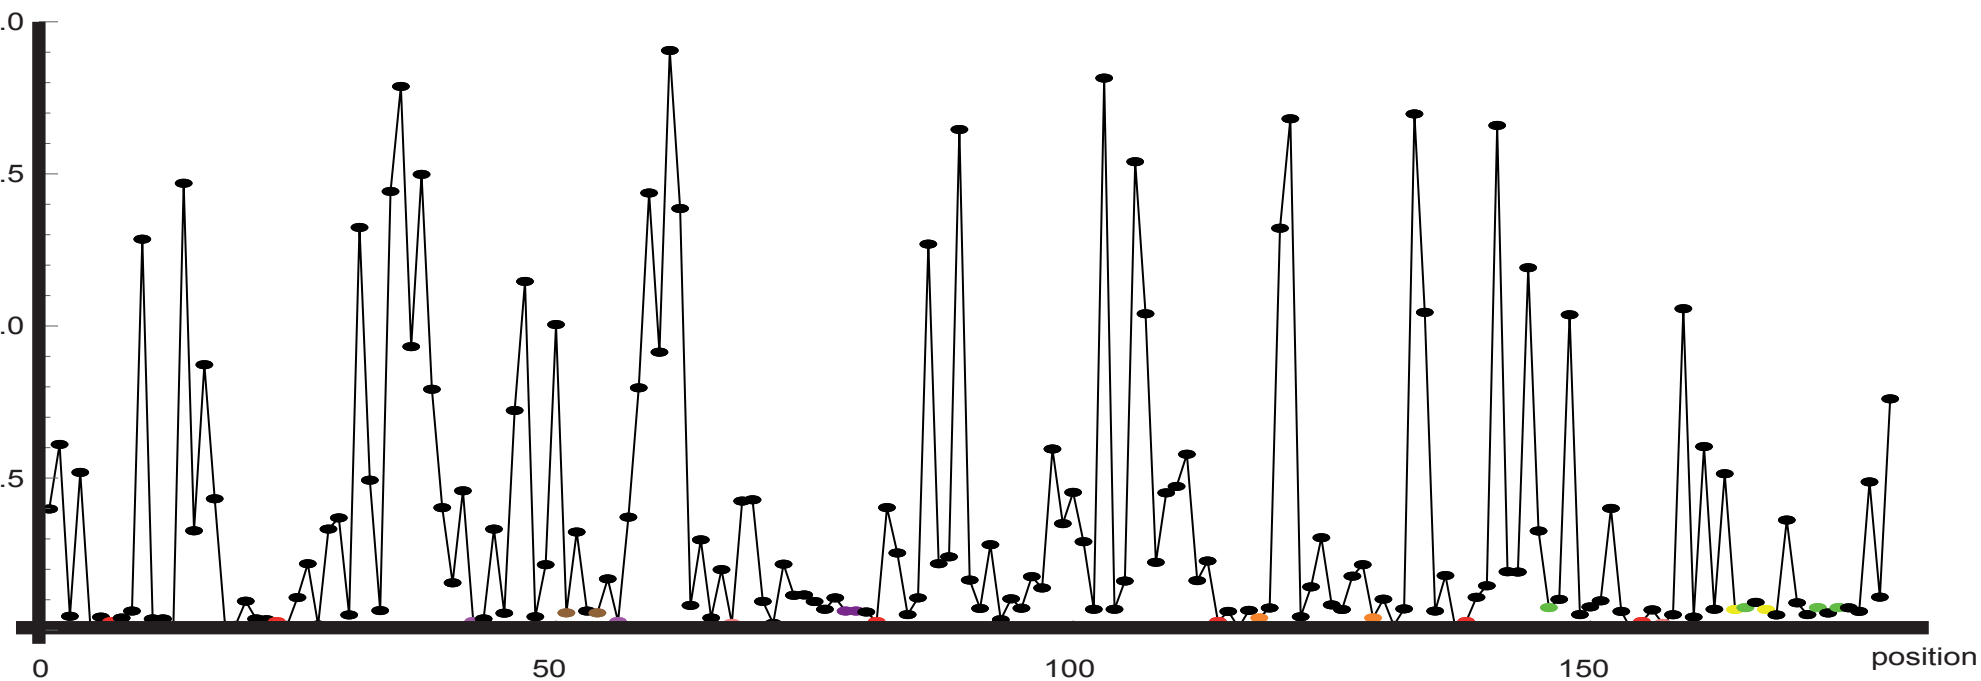

**b) PTC\_Bacteria**

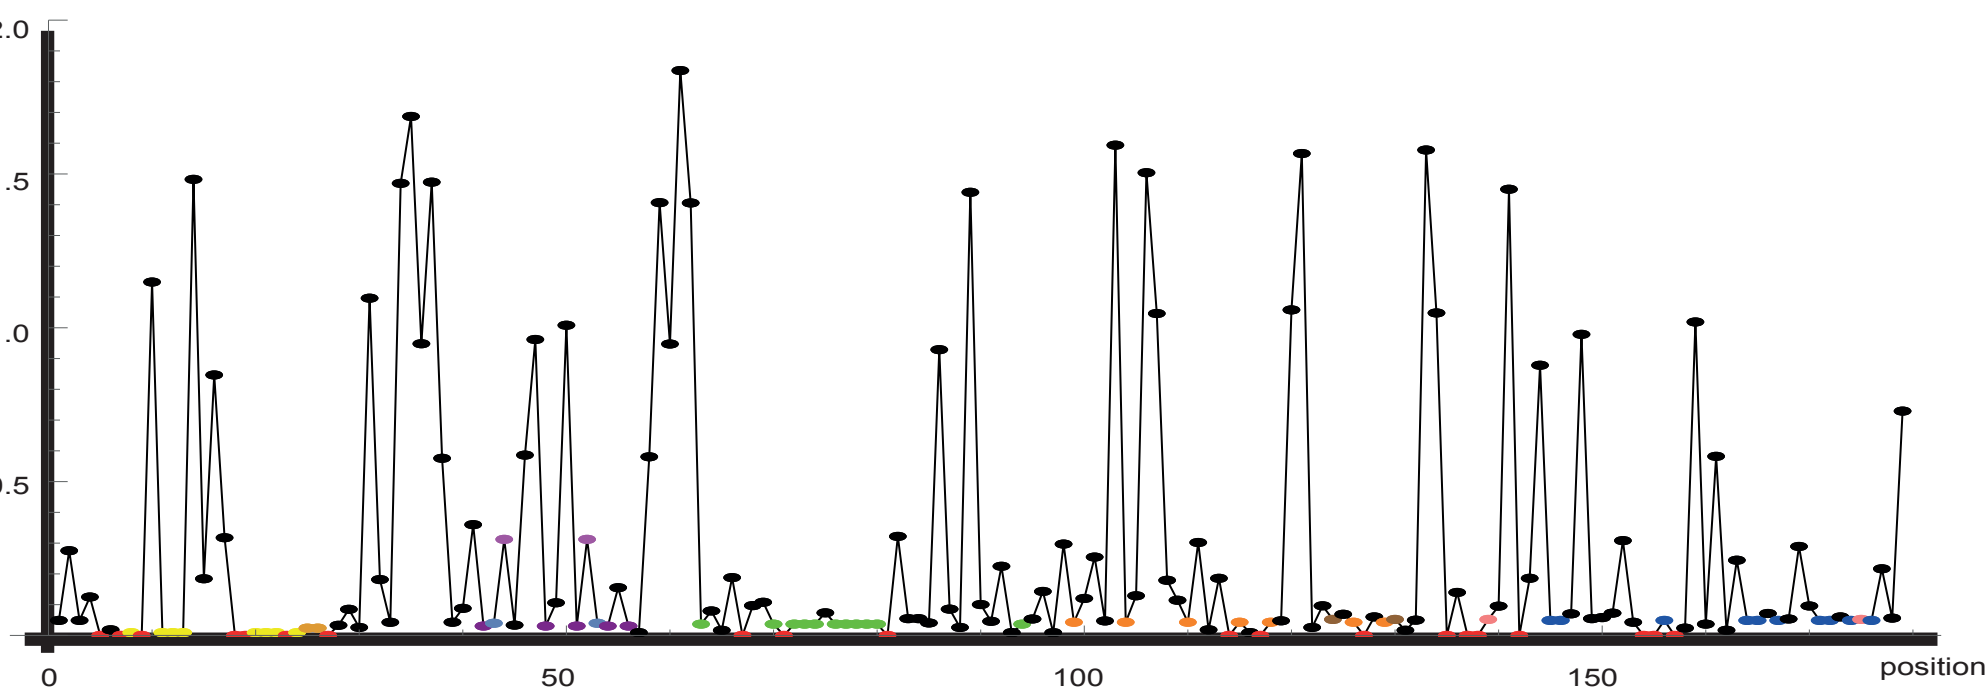

**c) PTC\_Archaea**

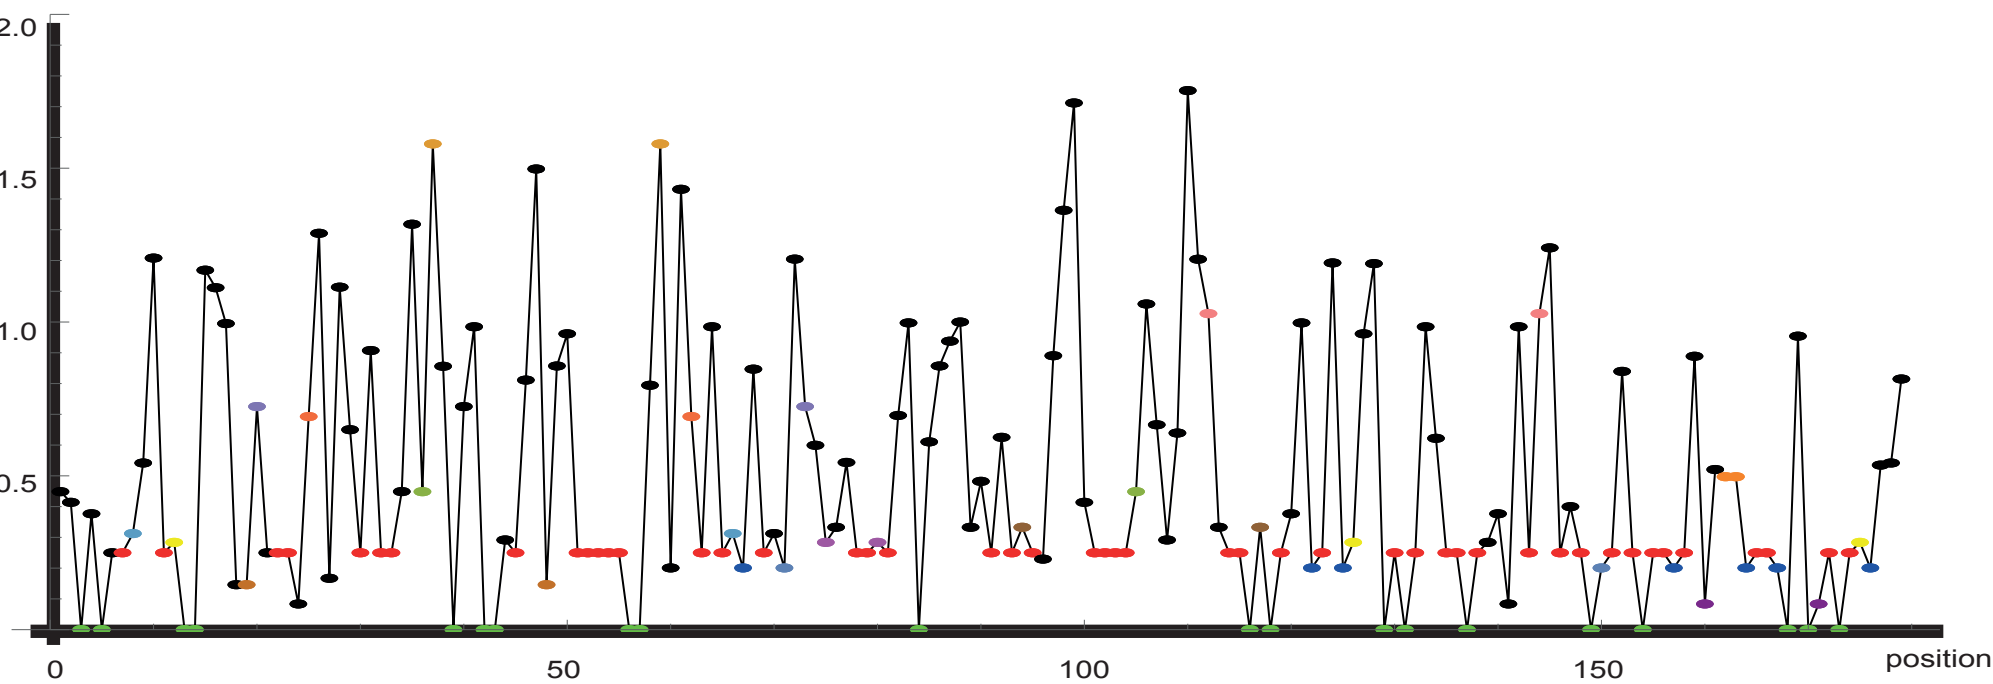

Supplement: s1 [file s1]

a)

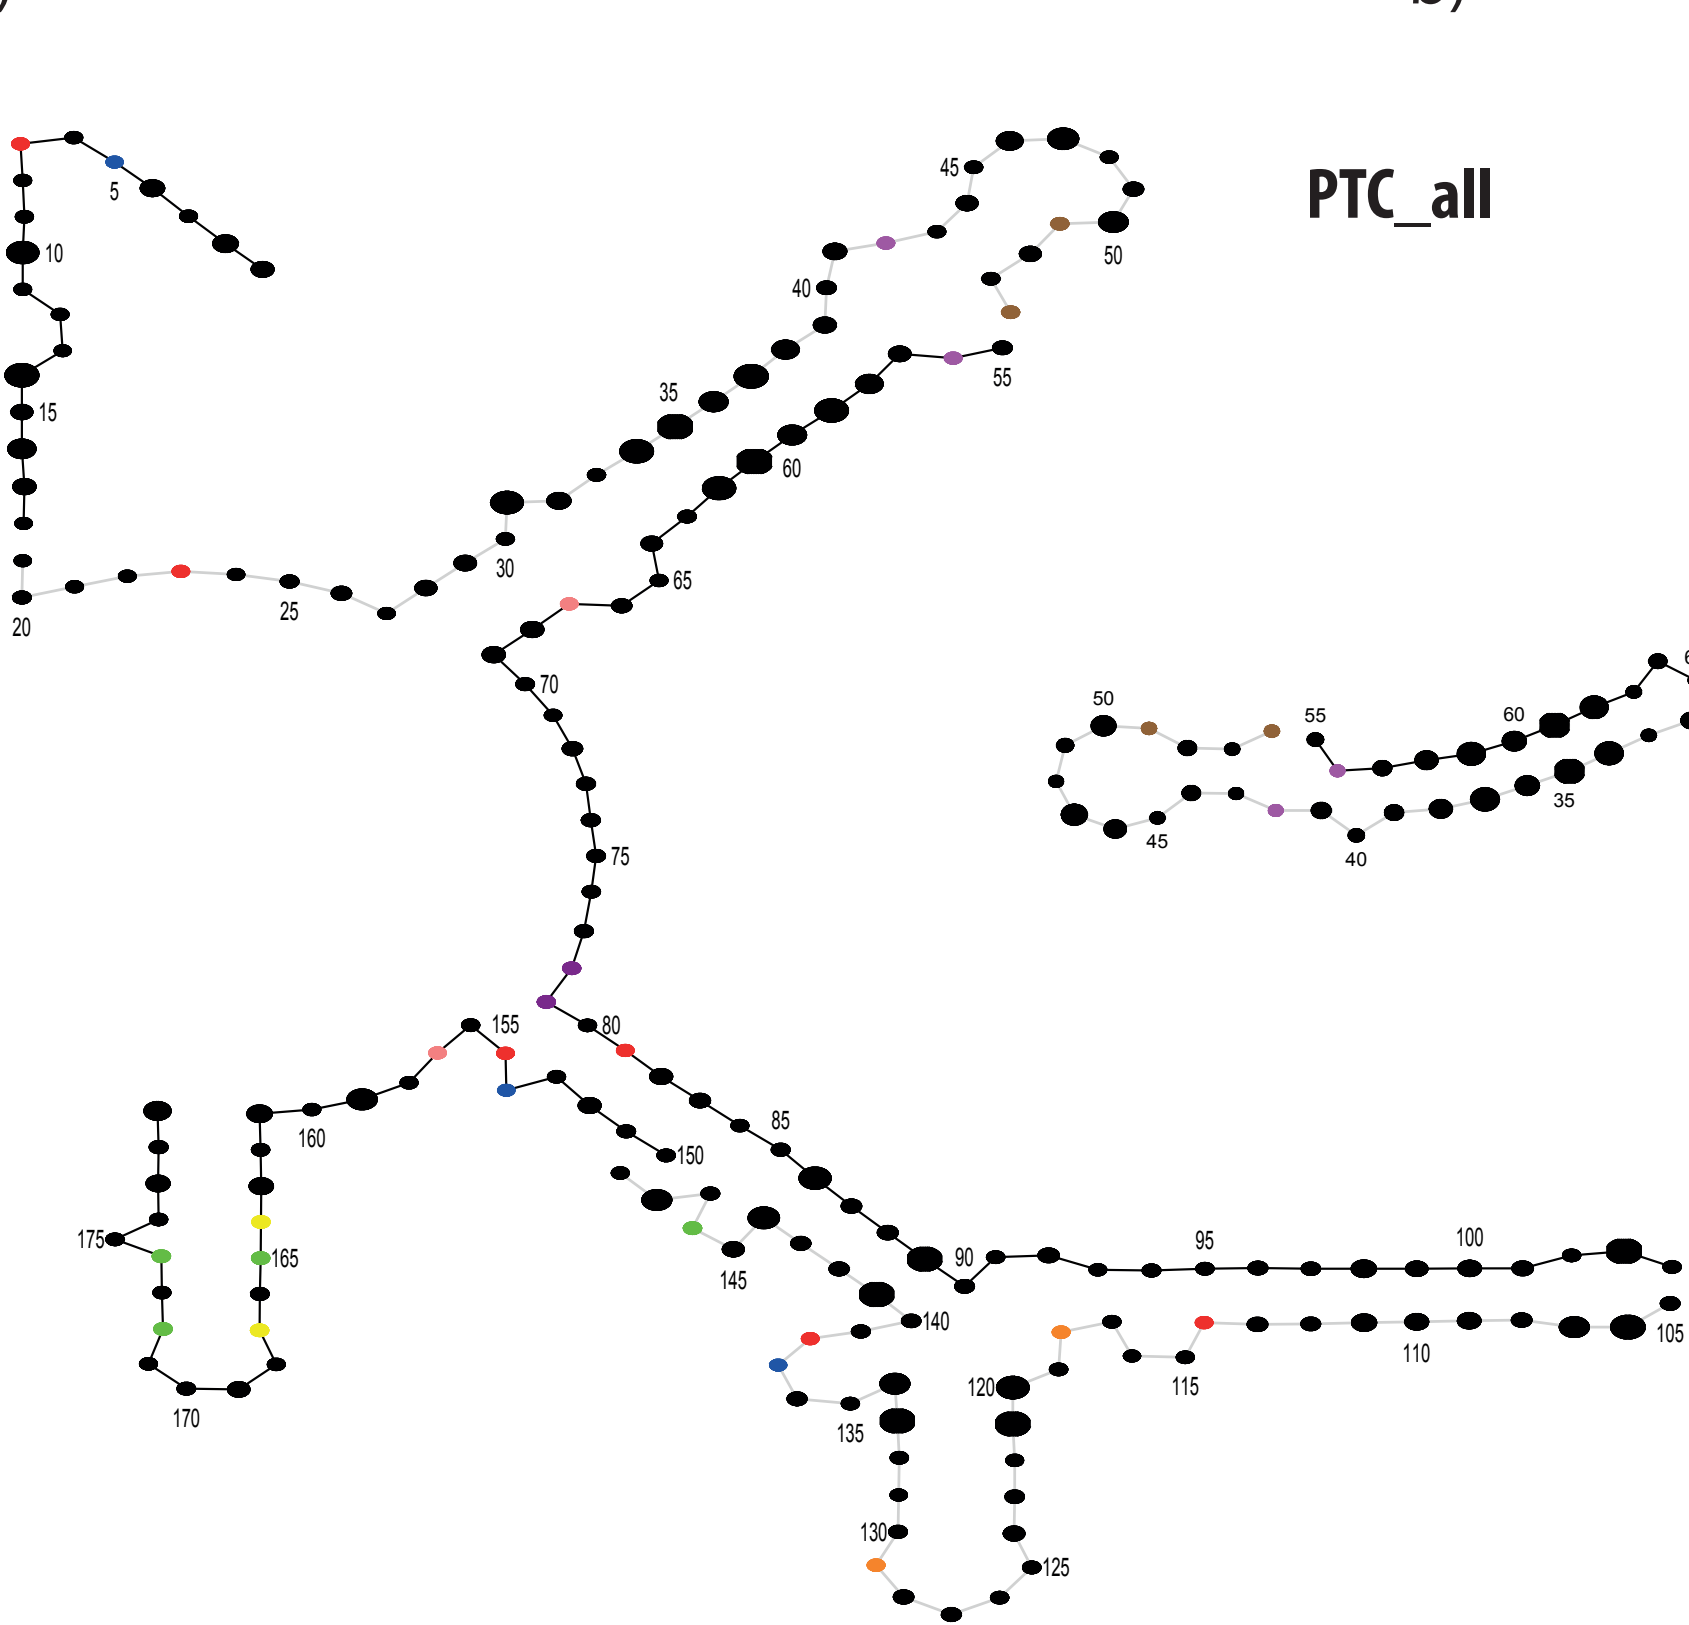

b)

PTC\_all

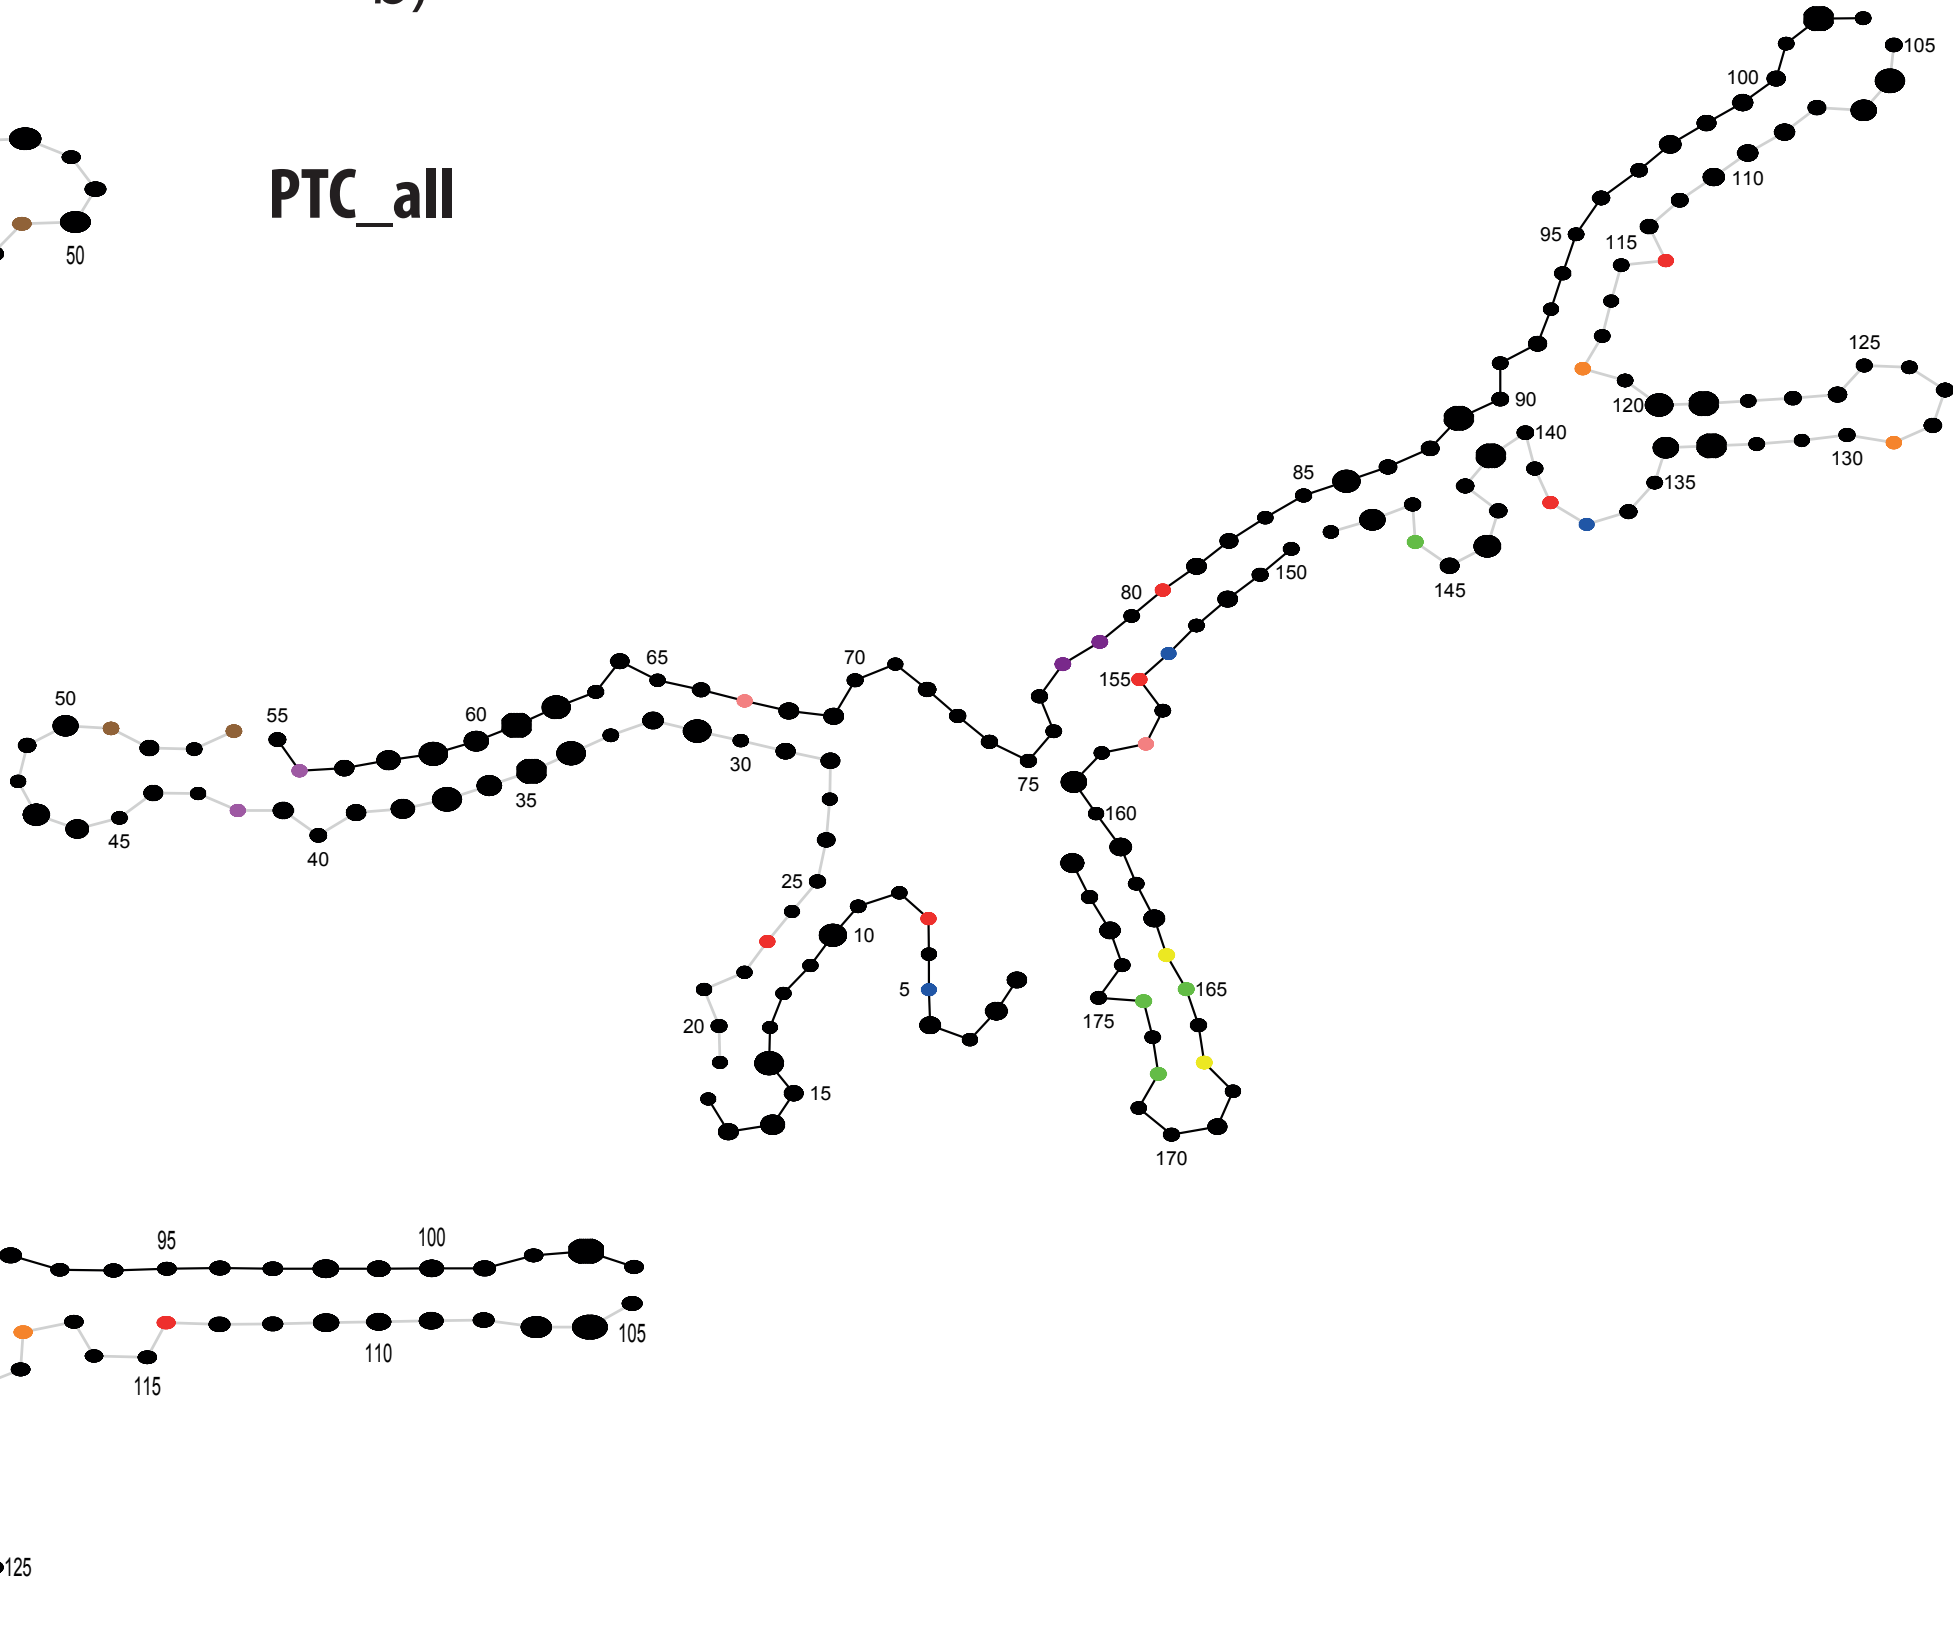

c)

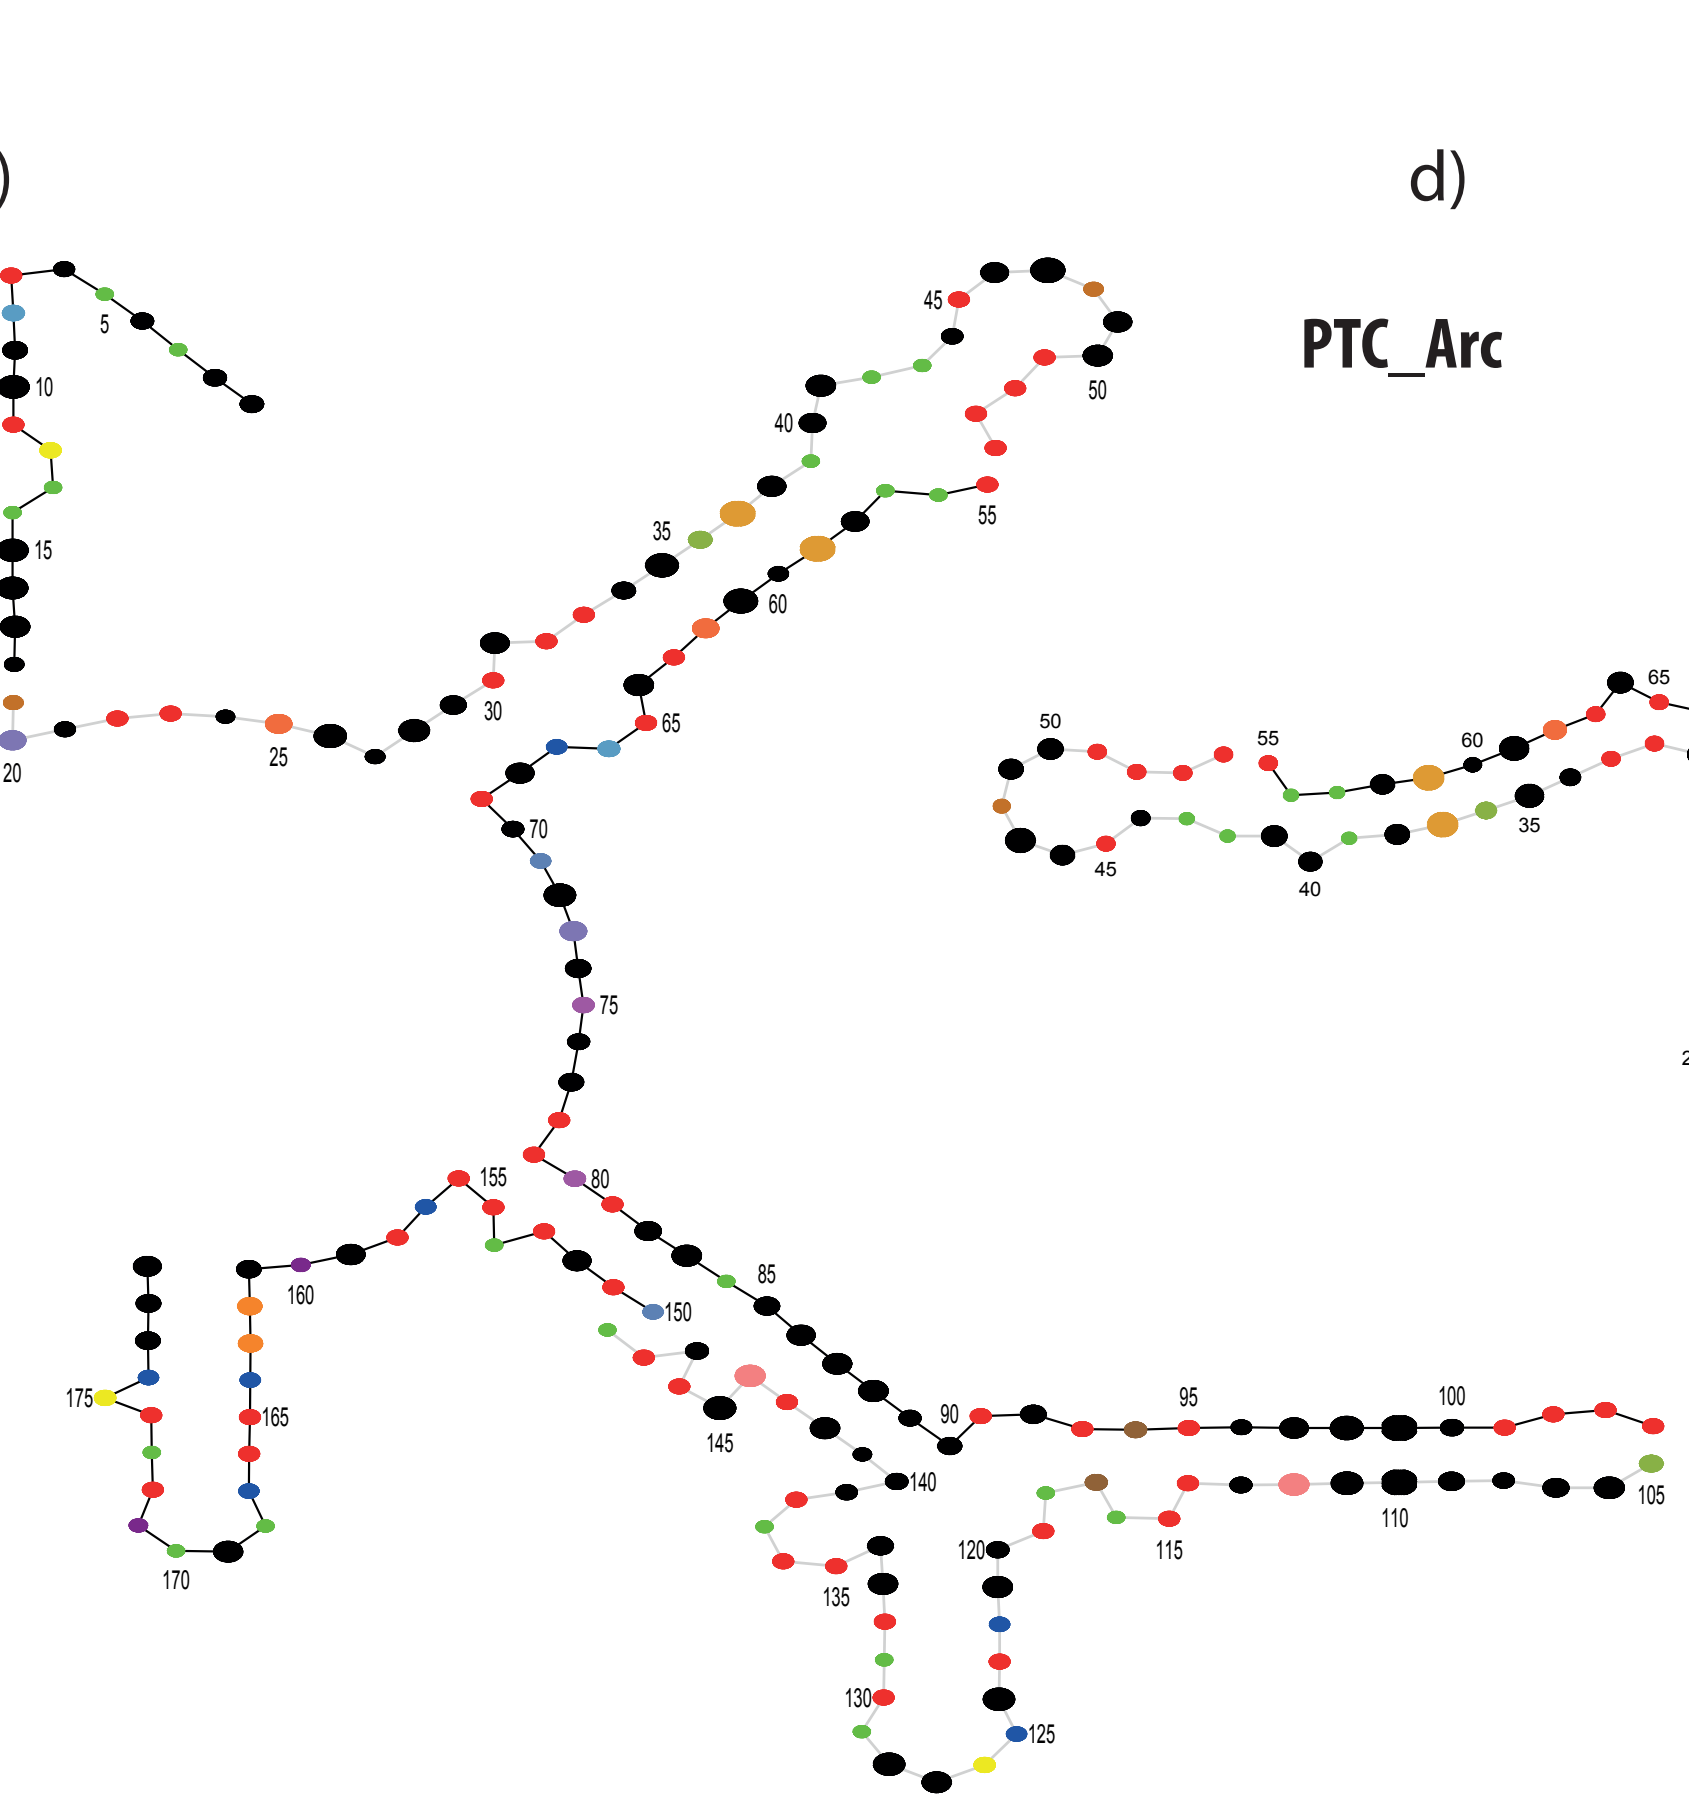

d)

PTC\_Arc

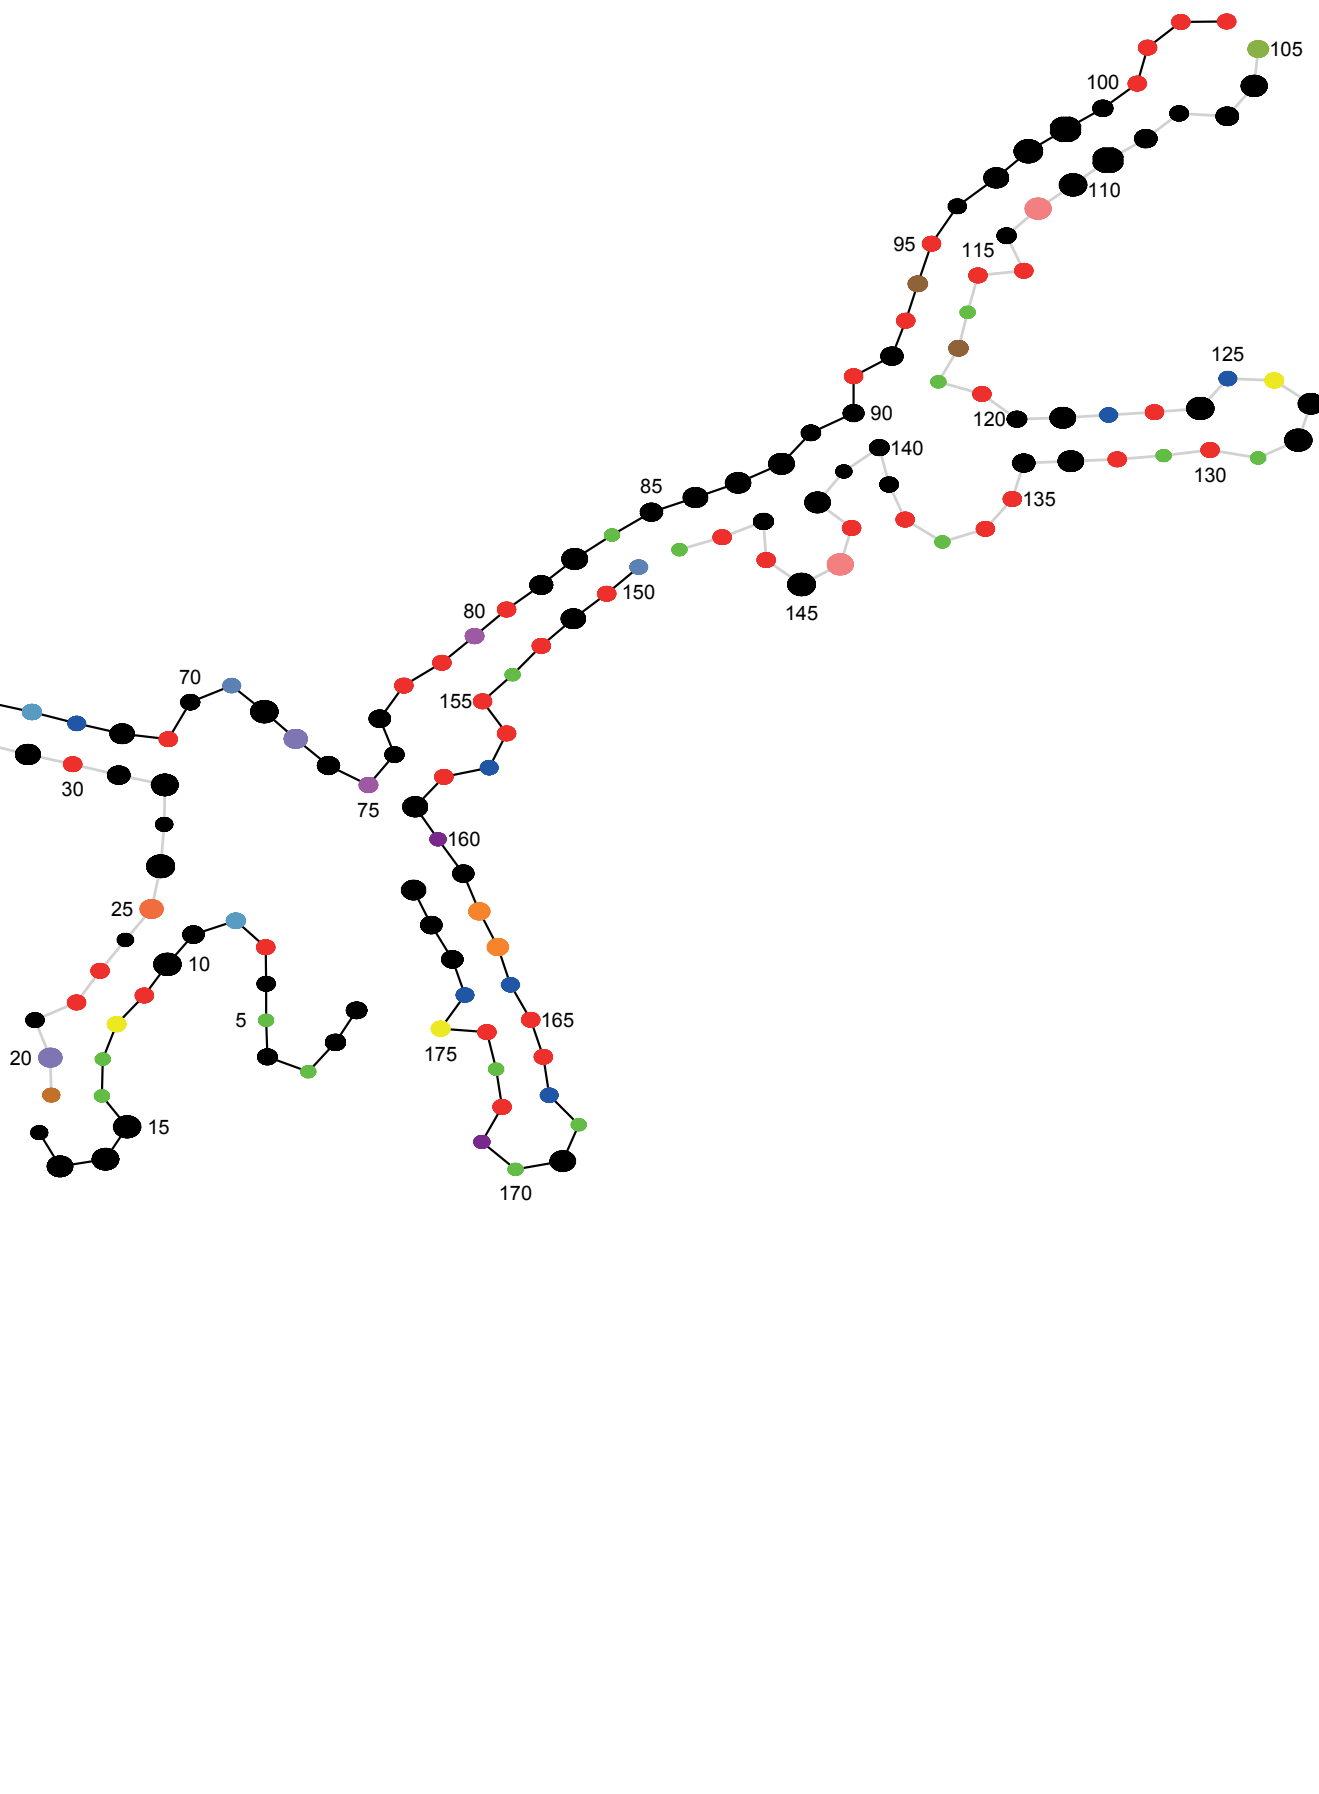

Supplement: s1 [file s1]
